# Supplementary material for: A novel ratiometric fluorescent probe based on an internal reference of lanthanide/nucleotide for alkaline phosphatase detection
Source: Royal Society of Chemistry journal article supplement (doi:10.1039/d4an01341g), 2024-11-22
Supplement: d4an01341g1.pdf [file d4an01341g1.pdf]

Supplementary material

**Novel Ratiometric Fluorescent Probe based on  
Internal Reference of Lanthanide/nucleotide for  
Alkaline Phosphatase Detection**

Haoran Yu, <sup>a</sup> Ziqing Qiang, <sup>a</sup> Yelin Sun, <sup>a</sup> Mengyao Sun, <sup>a</sup> Lei Zhang, <sup>a</sup> Bohao Yu, <sup>a\*</sup> Wen Lei <sup>b</sup>

and Weibing Zhang <sup>a\*</sup>

<sup>a</sup>Shanghai Key Laboratory of Functional Materials Chemistry, School of Chemistry & Molecular Engineering, East China University of Science and Technology, Shanghai 200237, P. R. China

<sup>b</sup>Shanghai Research Institute of Chemical Industry CO., LTD., 345 East Yunling Road, Shanghai, 200062, China.

Haoran Yu and Ziqing Qiang contributed equally to this work.

Corresponding authors: Bohao Yu, Weibing Zhang

\*E-mail: weibingzhang@ecust.edu.cn. Tel: +86-21-64252145. Fax: +86-021-64233161.

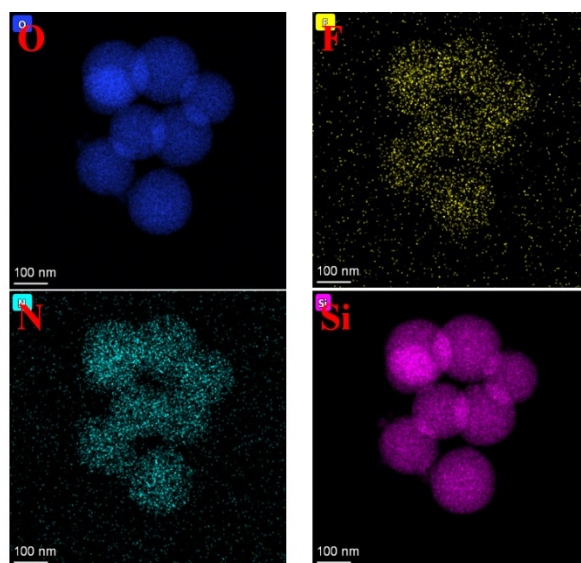

Figure S1. Layered images of each element in the CIP@SiO<sub>2</sub>.

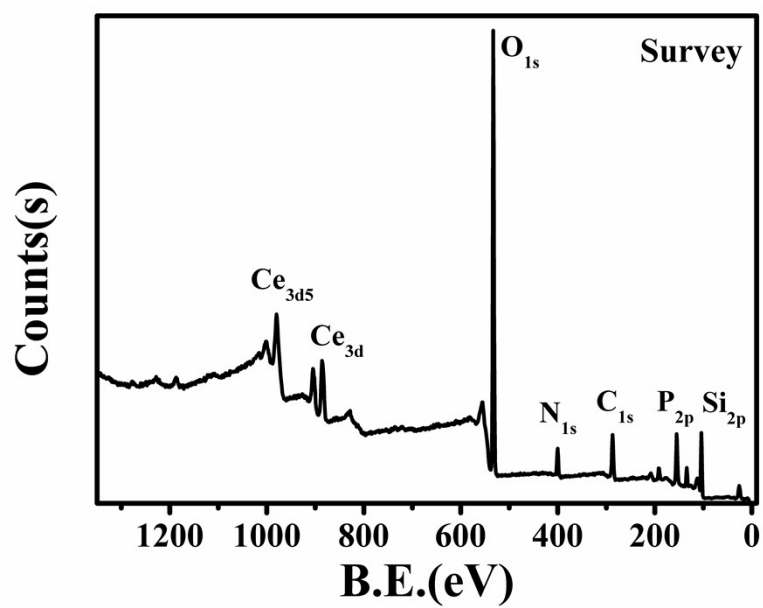

Figure S2. XPS survey spectra of CIP@SiO<sub>2</sub>-Ce/ATP-Tris.

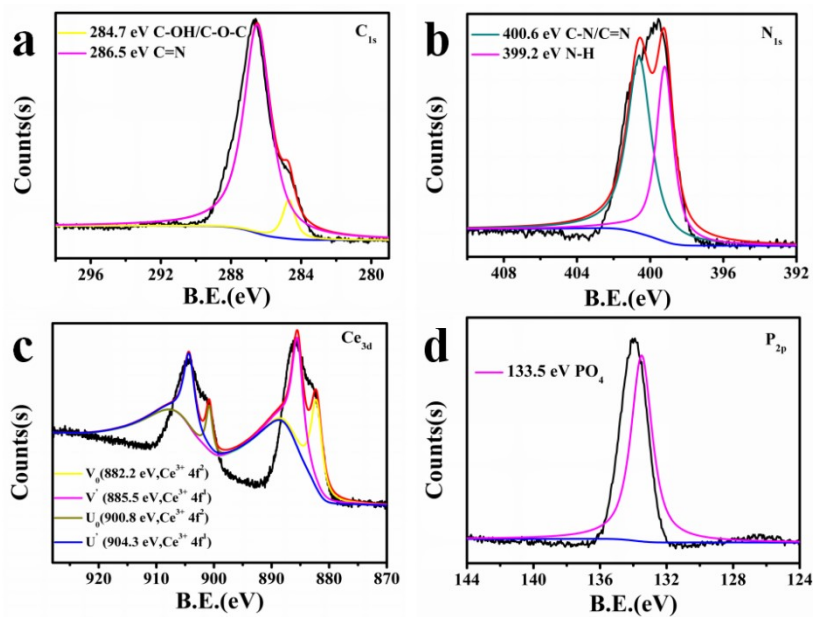

**Figure S3. High-resolution C1s (a), N1s (b), Ce3d (c) and P2p (d) peaks of CIP@SiO<sub>2</sub>-Ce/ATP-Tris.**

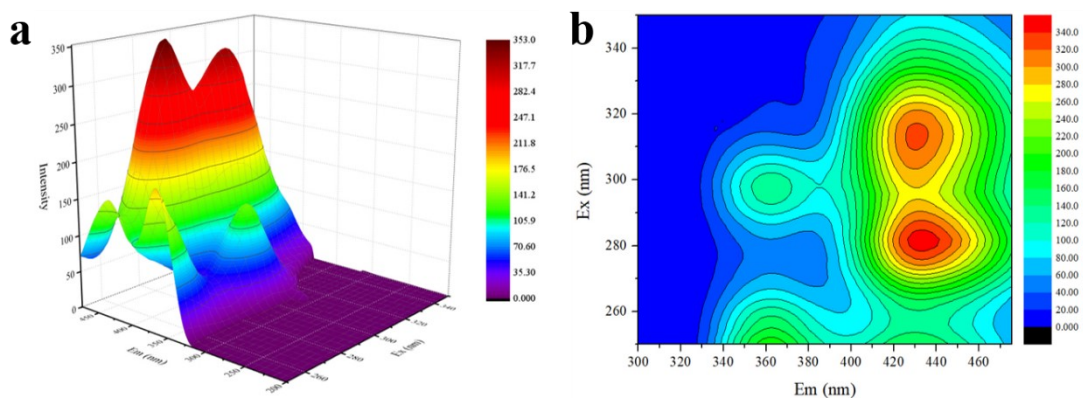

**Figure S4. 3-D fluorescence spectra (a) and fluorescence intensity contour map (b) of CIP@SiO<sub>2</sub>-Ce/ATP-Tris.**

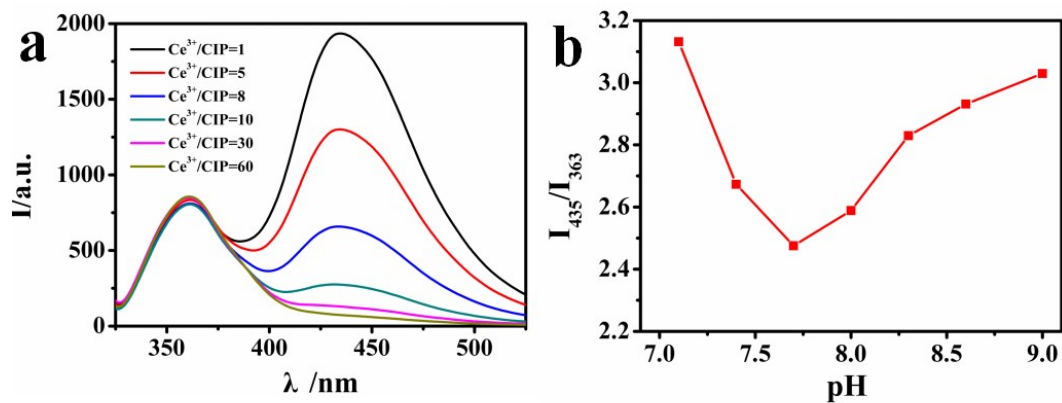

**Figure S5. Emission spectra of CIP@SiO<sub>2</sub>-Ce/ATP-Tris with different ratios of Ce<sup>3+</sup>/CIP (a) and effects of pH values on the ratio of fluorescence intensity of CIP@SiO<sub>2</sub>-Ce/ATP-Tris (b).**

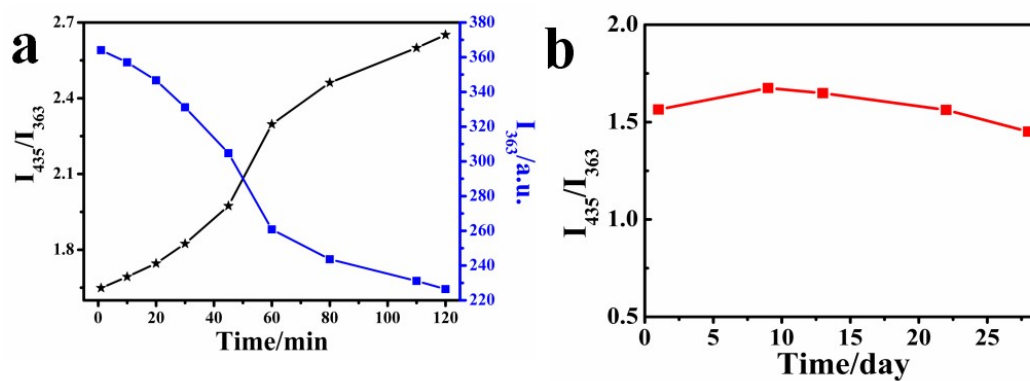

**Figure S6. Effects of enzymatic time on fluorescence intensity of CIP@SiO<sub>2</sub>-Ce/ATP-Tris (a) and the long-term stability of CIP@SiO<sub>2</sub>-Ce/ATP-Tris solution (b).**
